# Supplementary material for: Structural Insights Into The Binding of Nanobodies LaM2 and LaM4 to the Red Fluorescent Protein mCherry
Source: Research Square preprint supplement (doi:10.21203/rs.3.rs-424438/v2), 2021-06-30
Supplement: Supplementary file 1 [file fe0861fa07ececc6472c4b42.docx]

**Structural insights into the binding of nanobodies LaM2 and LaM4 to the red fluorescent protein mCherry**

Ziying Wang1, Long Li2, Rongting Hu2, Peiyu Zhong1, Yiran Zhang1, Shihao Cheng1, Rui Liu1, Yu Ding1#

**Supplementary data**


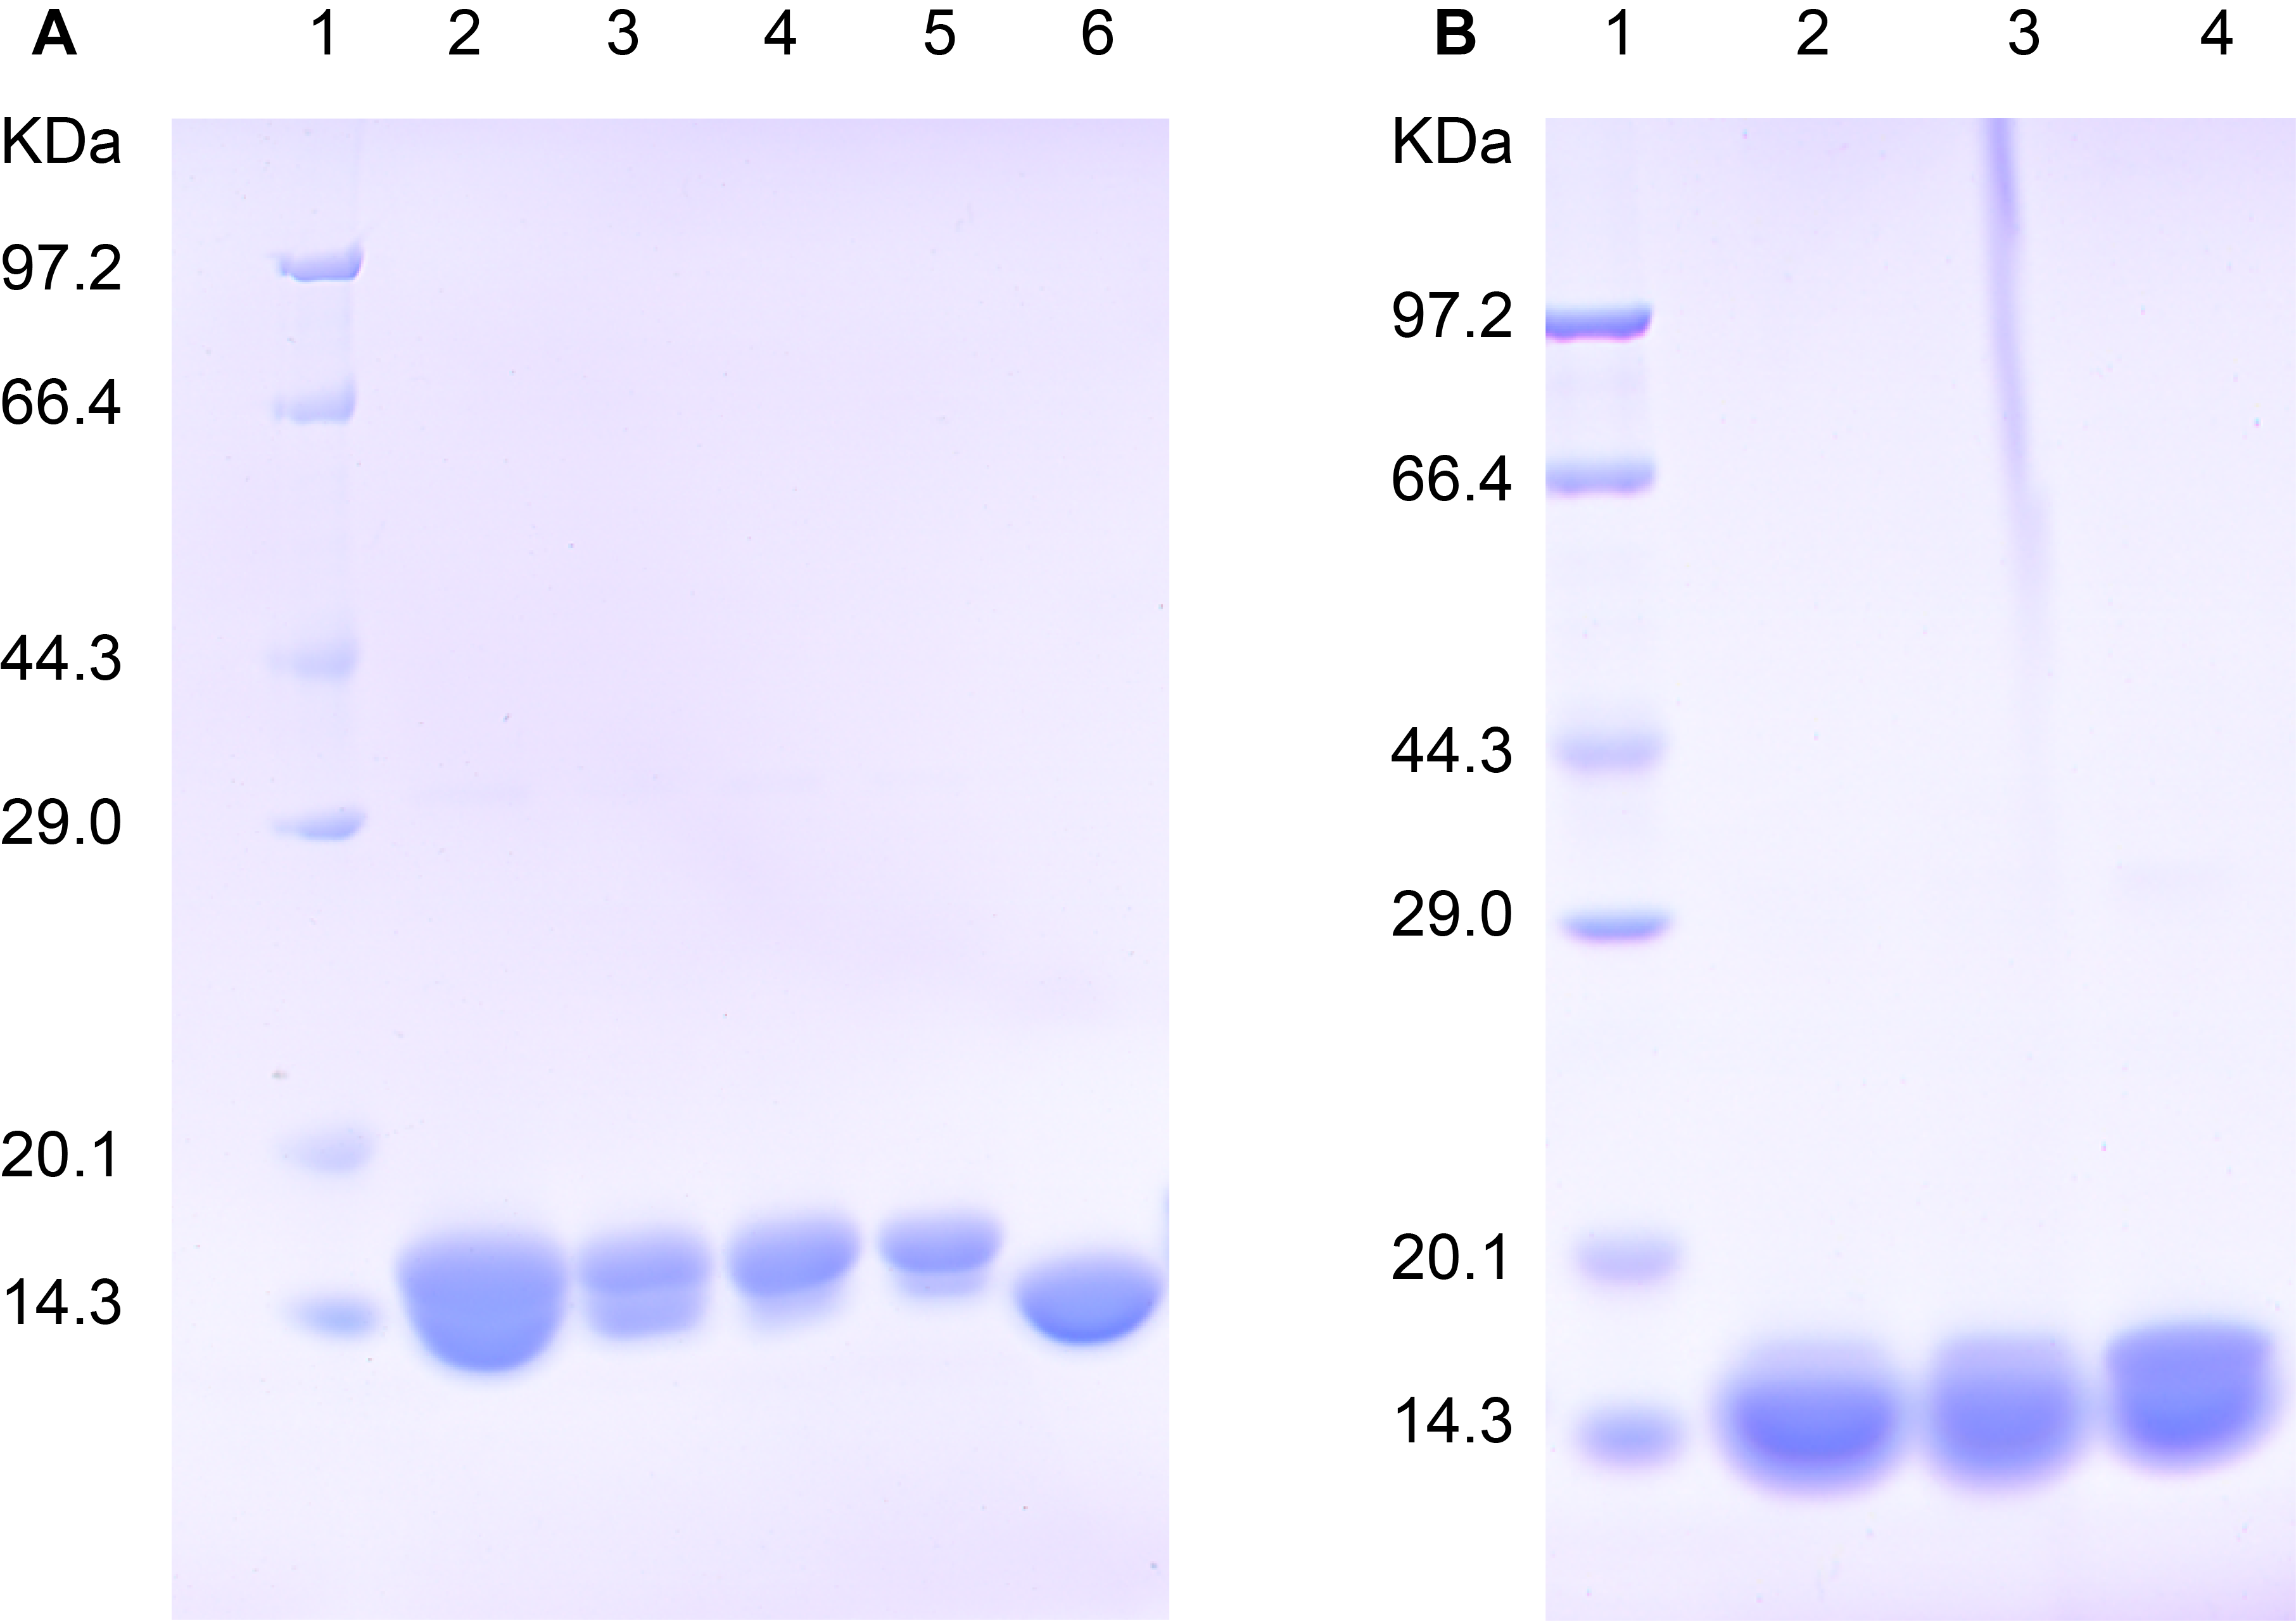


Figure S1 Expression and purification of LaM2, LaM4 and their mutants. A. Purification of LaM2 and corresponding mutants. 1. Marker, 2. LaM2, 3. LaM2_S44A, 4. LaM2_S68A, 5. LaM2_W119A/Y120A; B. Purification of LaM4 and corresponding mutants. 1. Marker, 2. LaM4, 3. LaM2_N104K, 4. LaM4_N109K.

Table S1.

The sequence of the primers used to generate LaM2 and LaM4 related mutants：

| **LaM2 variant** | **Sequence(5’🡪3’)** | **Direction** |
| --- | --- | --- |
| S44A | cctttgccgattatgcaatgggttggtttcg | Forward |
| gtgcaaccagcggttttacctttgccgatta | Reverse |
| S68A | gttgcagcaattagctgggcaggtcatgttacc | Forward |
| gcaattagctgggcaggtcatgttaccgattat | Reverse |
| W109AY110A | gcaaaaagcggcacctgggcggctcagcgtagcgaa | Forward |
| agcggcacctgggcggctcagcgtagcgaaaatgat | Reverse |

| **LaM4 variant** | **Sequence(5’🡪3’)** | **Direction** |
| --- | --- | --- |
| N104K | ggtaagtatattagcagcaatcagcgcctg | Forward |
| gtattattgtgcagccaatctgggtaagtatattagc | Reverse |
| N109K | gcagcaagcagcgcctgtatggttattg | Forward |
| ctgggtaactatattagcagcaagcagcgc | Reverse |

**Sequence alignment of LaM2 and the mutants:**

LaM2S68A SAQVQLVESGGGLVQAGGSLRLSCATSGFTFSDYAMGWFRQAPGKEREFVAAISWAGHVT 72

LaM2 SAQVQLVESGGGLVQAGGSLRLSCATSGFTFSDYAMGWFRQAPGKEREFVAAISWSGHVT 72

LaM2S44A SAQVQLVESGGGLVQAGGSLRLSCATSGFTFADYAMGWFRQAPGKEREFVAAISWSGHVT 72

LaM2WY SAQVQLVESGGGLVQAGGSLRLSCATSGFTFSDYAMGWFRQAPGKEREFVAAISWSGHVT 72

LaM2S44AWY SAQVQLVESGGGLVQAGGSLRLSCATSGFTFADYAMGWFRQAPGKEREFVAAISWSGHVT 72

*******************************:***********************:****

LaM2S68A DYADSVKGRFTISRDNVKNTVYLQMNSLKPEDTAVYSCAAAKSGTWWYQRSENDFGSWGQ 132

LaM2 DYADSVKGRFTISRDNVKNTVYLQMNSLKPEDTAVYSCAAAKSGTWWYQRSENDFGSWGQ 132

LaM2S44A DYADSVKGRFTISRDNVKNTVYLQMNSLKPEDTAVYSCAAAKSGTWWYQRSENDFGSWGQ 132

LaM2WY DYADSVKGRFTISRDNVKNTVYLQMNSLKPEDTAVYSCAAAKSGTWAAQRSENDFGSWGQ 132

LaM2S44AWY DYADSVKGRFTISRDNVKNTVYLQMNSLKPEDTAVYSCAAAKSGTWAAQRSENDFGSWGQ 132

********************************************** ************

LaM2S68A GTQVTVS 139

LaM2 GTQVTVS 139

LaM2S44A GTQVTVS 139

LaM2WY GTQVTVS 139

LaM2S44AWY GTQVTVS 139

*******

**Sequence alignment of LaM4 and the mutants:**

LaM4N109K GAQVQLVESGGSLVQPGGSLRLSCAASGRFAESSSMGWFRQAPGKEREFVAAISWSGGAT 60

LaM4N104K GAQVQLVESGGSLVQPGGSLRLSCAASGRFAESSSMGWFRQAPGKEREFVAAISWSGGAT 60

LaM4 GAQVQLVESGGSLVQPGGSLRLSCAASGRFAESSSMGWFRQAPGKEREFVAAISWSGGAT 60

************************************************************

LaM4N109K NYADSAKGRFTLSRDNTKNTVYLQMNSLKPDDTAVYYCAANLGNYISSKQRLYGYWGQGT 120

LaM4N104K NYADSAKGRFTLSRDNTKNTVYLQMNSLKPDDTAVYYCAANLGKYISSNQRLYGYWGQGT 120

LaM4 NYADSAKGRFTLSRDNTKNTVYLQMNSLKPDDTAVYYCAANLGNYISSNQRLYGYWGQGT 120

*******************************************:****:***********

LaM4N109K QVTVSSPFTLE 131

LaM4N104K QVTVSSPFTLE 131

LaM4 QVTVSSPFTLE 131

***********
